# Supplementary material
Source: publisher figshare collection journal article supplement (https://acs.figshare.com/ndownloader/files/5459417)
Supplement: Supplementary file 1 [file 5459417]

## Supporting data

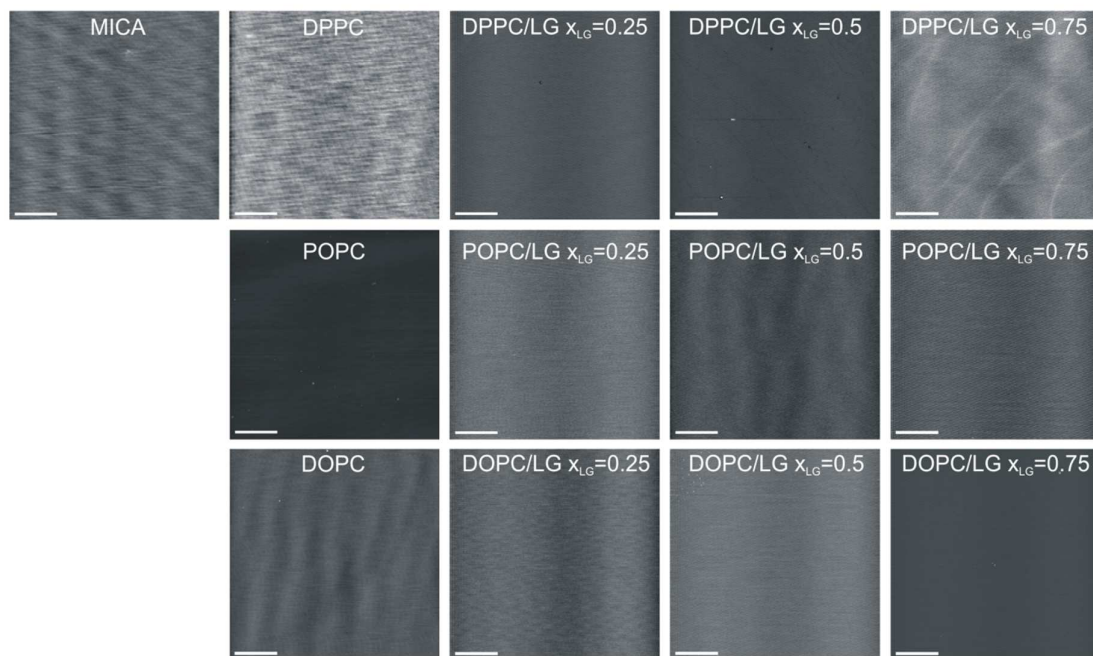

**Figure S1.** AFM images for the bare mica support, one-component monolayers of DPPC, POPC, DOPC, and binary monolayers of DPPC/LG, POPC/LG, DOPC/LG, at different LG molar fractions. The image sizes  $10 \times 10 \mu\text{m}^2$ , scale bar =  $2.0 \mu\text{m}$ .
